# Supplementary material for: Development of the Chicago Food Allergy Research Surveys: assessing knowledge, attitudes, and beliefs of parents, physicians, and the general public
Source: PubMed Central journal article supplement (PMC2736935; doi:10.1186/1472-6963-9-142), 2009-08-07
Supplement: 1472-6963-9-142-S3.pdf [file 1472-6963-9-142-S3.pdf]

# The Chicago Food Allergy Research Survey for the General Public

*The following survey is part of a study being conducted by researchers at Children’s Memorial Hospital and Northwestern University Feinberg School of Medicine in Chicago, Illinois. The goal of this survey is to assess food allergy knowledge, attitudes and beliefs of the general public.*

---

## Before beginning the survey, please answer the following questions:

1. Do you know anyone with a food allergy?

No

Yes (Mark all that apply):

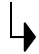

Me

Child ages 0-18

Spouse/partner

Friend or relative

Child’s classmate or friend

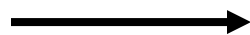

1a. Does your child have a current food allergy that has been diagnosed by a doctor?

No

Yes

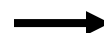

We’re sorry, but you are not eligible for this survey. Thank you for your interest.

2. Are you a pediatrician or a family practitioner?

Yes

No

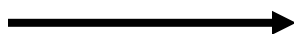

We’re sorry, but you are not eligible for this survey. Thank you for your interest.

3. In which state do you live?

State: \_\_\_\_\_

---

Please mark one box for each statement below.

|                                                                                                                            | <u>TRUE</u>                                                                                     | <u>FALSE</u>                                                                                                                                                                              | <u>I DON'T KNOW</u>      |
|----------------------------------------------------------------------------------------------------------------------------|-------------------------------------------------------------------------------------------------|-------------------------------------------------------------------------------------------------------------------------------------------------------------------------------------------|--------------------------|
| 1. An allergic reaction can happen when the body considers a food to be harmful.                                           | <input type="checkbox"/>                                                                        | <input type="checkbox"/>                                                                                                                                                                  | <input type="checkbox"/> |
| 2. Lactose intolerance (trouble digesting dairy products) is the same as having a milk allergy.                            | <input type="checkbox"/>                                                                        | <input type="checkbox"/>                                                                                                                                                                  | <input type="checkbox"/> |
| 3. A person can die from having a food allergy reaction.                                                                   | <input type="checkbox"/>                                                                        | <input type="checkbox"/>                                                                                                                                                                  | <input type="checkbox"/> |
| 4. Hives (red bumps or blotches on the skin that can be itchy) are a <u>common</u> symptom of a food allergy reaction.     | <input type="checkbox"/>                                                                        | <input type="checkbox"/>                                                                                                                                                                  | <input type="checkbox"/> |
| 5. People with food allergies can have an allergic reaction after touching a food.                                         | <input type="checkbox"/>                                                                        | <input type="checkbox"/>                                                                                                                                                                  | <input type="checkbox"/> |
| 6. A person with a milk allergy can still drink low-fat milk without having an allergic reaction.                          | <input type="checkbox"/>                                                                        | <input type="checkbox"/>                                                                                                                                                                  | <input type="checkbox"/> |
| 7. Foods eaten by a mother can be passed to her child through her breast milk.                                             | <input type="checkbox"/>                                                                        | <input type="checkbox"/>                                                                                                                                                                  | <input type="checkbox"/> |
| 8. Acidic foods (like lemons, oranges, and tomatoes) <u>commonly</u> cause food allergy.                                   | <input type="checkbox"/>                                                                        | <input type="checkbox"/>                                                                                                                                                                  | <input type="checkbox"/> |
| 9. Allergic diseases run in families.                                                                                      | <input type="checkbox"/>                                                                        | <input type="checkbox"/>                                                                                                                                                                  | <input type="checkbox"/> |
| 10. Food allergies can go away as a person gets older.                                                                     | <input type="checkbox"/>                                                                        | <input type="checkbox"/>                                                                                                                                                                  | <input type="checkbox"/> |
| 11. Food allergy is more common in children than adults.                                                                   | <input type="checkbox"/>                                                                        | <input type="checkbox"/>                                                                                                                                                                  | <input type="checkbox"/> |
| 12. The number of children in the United States who have a food allergy has been increasing over the past ten years.       | <input type="checkbox"/>                                                                        | <input type="checkbox"/>                                                                                                                                                                  | <input type="checkbox"/> |
| 13. There is a cure for food allergy.                                                                                      | <input type="checkbox"/>                                                                        | <input type="checkbox"/>                                                                                                                                                                  | <input type="checkbox"/> |
| 14. The <u>only</u> way to prevent an allergic reaction is to stay away from the food that causes the allergy.             | <input type="checkbox"/>                                                                        | <input type="checkbox"/>                                                                                                                                                                  | <input type="checkbox"/> |
| 15. A person can take a medicine everyday to prevent having food allergy reactions.                                        | <input type="checkbox"/>                                                                        | <input type="checkbox"/>                                                                                                                                                                  | <input type="checkbox"/> |
| 16. There is a law in the United States that requires all foods to be labeled with allergy information.                    | <input type="checkbox"/>                                                                        | <input type="checkbox"/>                                                                                                                                                                  | <input type="checkbox"/> |
| 17. Which of the following are the <u>three</u> most common food allergies in <u>children</u> ? Mark <u>three</u> answers. | <input type="checkbox"/> Egg<br><input type="checkbox"/> Wheat<br><input type="checkbox"/> Milk | <input type="checkbox"/> Peanut<br><input type="checkbox"/> Tree nuts ( <i>almonds, walnuts, pecans, cashews</i> )<br><input type="checkbox"/> Shellfish ( <i>shrimp, lobster, crab</i> ) |                          |
| 18. Which of the following is the most common food allergy in <u>adults</u> ? Mark <u>one</u> answer.                      | <input type="checkbox"/> Milk<br><input type="checkbox"/> Peanut                                | <input type="checkbox"/> Shellfish ( <i>shrimp, lobster, crab</i> )<br><input type="checkbox"/> I don't know                                                                              |                          |

19. A boy with a milk allergy accidentally drank some milk. Please mark which of the following could be a sign of food allergy reaction. Mark all that apply.

- After 2 days he gets hyperactive and cranky and has headaches
- After 15 minutes he gets hives on his face and chest
- Immediately his tongue swells and he has trouble breathing
- He has a stuffy nose that won't go away for weeks

Please mark one box for each statement below.

|                                                                                                                           | <u>Strongly Disagree</u>                                                                                                                                                                                                                                                                                                                                                                                                         | <u>Disagree</u>          | <u>Neither Agree nor Disagree</u> | <u>Agree</u>             | <u>Strongly Agree</u>    |
|---------------------------------------------------------------------------------------------------------------------------|----------------------------------------------------------------------------------------------------------------------------------------------------------------------------------------------------------------------------------------------------------------------------------------------------------------------------------------------------------------------------------------------------------------------------------|--------------------------|-----------------------------------|--------------------------|--------------------------|
| 20. Food allergy is a serious health problem in the United States.                                                        | <input type="checkbox"/>                                                                                                                                                                                                                                                                                                                                                                                                         | <input type="checkbox"/> | <input type="checkbox"/>          | <input type="checkbox"/> | <input type="checkbox"/> |
| 21. People with food allergies are treated differently because of their food allergy.                                     | <input type="checkbox"/>                                                                                                                                                                                                                                                                                                                                                                                                         | <input type="checkbox"/> | <input type="checkbox"/>          | <input type="checkbox"/> | <input type="checkbox"/> |
| 22. Children with food allergies have overprotective parents.                                                             | <input type="checkbox"/>                                                                                                                                                                                                                                                                                                                                                                                                         | <input type="checkbox"/> | <input type="checkbox"/>          | <input type="checkbox"/> | <input type="checkbox"/> |
| 23. Children with food allergies are teased at school.                                                                    | <input type="checkbox"/>                                                                                                                                                                                                                                                                                                                                                                                                         | <input type="checkbox"/> | <input type="checkbox"/>          | <input type="checkbox"/> | <input type="checkbox"/> |
| 24. For someone who has a food allergy, staying away from the food that he or she is allergic to is difficult.            | <input type="checkbox"/>                                                                                                                                                                                                                                                                                                                                                                                                         | <input type="checkbox"/> | <input type="checkbox"/>          | <input type="checkbox"/> | <input type="checkbox"/> |
| 25. People with food allergies worry a lot about their allergy.                                                           | <input type="checkbox"/>                                                                                                                                                                                                                                                                                                                                                                                                         | <input type="checkbox"/> | <input type="checkbox"/>          | <input type="checkbox"/> | <input type="checkbox"/> |
| 26. It is difficult for people with food allergies to safely eat at restaurants.                                          | <input type="checkbox"/>                                                                                                                                                                                                                                                                                                                                                                                                         | <input type="checkbox"/> | <input type="checkbox"/>          | <input type="checkbox"/> | <input type="checkbox"/> |
| 27. Having an EpiPen or Twinject (injectable epinephrine) is important for most children with severe food allergies.      | <input type="checkbox"/>                                                                                                                                                                                                                                                                                                                                                                                                         | <input type="checkbox"/> | <input type="checkbox"/>          | <input type="checkbox"/> | <input type="checkbox"/> |
| 28. Schools should have plans for keeping children with food allergies safe at school.                                    | <input type="checkbox"/>                                                                                                                                                                                                                                                                                                                                                                                                         | <input type="checkbox"/> | <input type="checkbox"/>          | <input type="checkbox"/> | <input type="checkbox"/> |
| 29. Which of the following do you think is the most important to help people with food allergies? Mark <u>one</u> answer. | <ul style="list-style-type: none"> <li><input type="checkbox"/> Develop a cure for food allergy</li> <li><input type="checkbox"/> Improve the treatments of food allergy</li> <li><input type="checkbox"/> Find the causes of food allergy</li> <li><input type="checkbox"/> Promote school education programs for food allergy</li> <li><input type="checkbox"/> Promote public awareness campaigns for food allergy</li> </ul> |                          |                                   |                          |                          |
| 30. Which of the following would be the best way to learn about food allergy? Mark <u>one</u> answer.                     | <ul style="list-style-type: none"> <li><input type="checkbox"/> Radio</li> <li><input type="checkbox"/> Television (TV)</li> <li><input type="checkbox"/> Handout/Brochure</li> <li><input type="checkbox"/> Internet/Email</li> <li><input type="checkbox"/> Newspapers/Magazines</li> <li><input type="checkbox"/> Other: _____</li> </ul>                                                                                     |                          |                                   |                          |                          |

---

**Before continuing, please answer the following questions:**

1. Do you have children under the age of 18?

No      **➔** Please skip to the next page.

Yes      **➔** Please continue to the next question.

2. Do your children attend any of the following?  
Mark all that apply.

No children      **➔** Please skip to the next page.  
 No children in school

Preschool  
 Elementary School      **➔** Please continue to the next question.  
 Middle School  
 High School

---

**Please mark one box for each statement below.**

|                                                                                                                                        | <u>Strongly Disagree</u>                                                                                                                                                                                                                                                                                                             | <u>Disagree</u>          | <u>Neither Agree nor Disagree</u> | <u>Agree</u>             | <u>Strongly Agree</u>    |
|----------------------------------------------------------------------------------------------------------------------------------------|--------------------------------------------------------------------------------------------------------------------------------------------------------------------------------------------------------------------------------------------------------------------------------------------------------------------------------------|--------------------------|-----------------------------------|--------------------------|--------------------------|
| 31. Schools should ban all products with nuts.                                                                                         | <input type="checkbox"/>                                                                                                                                                                                                                                                                                                             | <input type="checkbox"/> | <input type="checkbox"/>          | <input type="checkbox"/> | <input type="checkbox"/> |
| 32. Schools should have special tables where children with food allergies can safely eat lunch.                                        | <input type="checkbox"/>                                                                                                                                                                                                                                                                                                             | <input type="checkbox"/> | <input type="checkbox"/>          | <input type="checkbox"/> | <input type="checkbox"/> |
| 33. It would be unfair if my child could not have a peanut butter sandwich because of another student's peanut allergy.                | <input type="checkbox"/>                                                                                                                                                                                                                                                                                                             | <input type="checkbox"/> | <input type="checkbox"/>          | <input type="checkbox"/> | <input type="checkbox"/> |
| 34. I would worry about having a child with food allergy play at my house.                                                             | <input type="checkbox"/>                                                                                                                                                                                                                                                                                                             | <input type="checkbox"/> | <input type="checkbox"/>          | <input type="checkbox"/> | <input type="checkbox"/> |
| 35. What would be the best way for schools to teach parents about how to protect children with food allergies? Mark <u>one</u> answer. | <input type="checkbox"/> Handouts/brochures in the mail<br><input type="checkbox"/> Presentation at parent-teacher meetings<br><input type="checkbox"/> Parents of food-allergic children talking to other parents<br><input type="checkbox"/> Doctor or nurse talking about food allergies<br><input type="checkbox"/> Other: _____ |                          |                                   |                          |                          |

**➤ Please continue to the next page.**

**Please tell us about yourself.**

1. How old are you?  18 - 24  25 - 44  
 45 - 65  Over 65
2. What is your gender?  Male  Female
3. What is your race/ethnicity? Mark all that apply.  
 White  
 African American  
 Hispanic or Latino  
 Asian  
 Other: \_\_\_\_\_
4. What is the highest education level you have completed?  Less than high school  4 year college  
 High school  Graduate degree  
 2 year college
5. Which of the following categories best represents the **combined income for all family members in your household** for the past 12 months before taxes?  Less than \$25,000  \$75,000 - \$99,999  
 \$25,000 - \$49,999  \$100,000 - \$149,999  
 \$50,000 - \$74,999  \$150,000 or more
6. Have you had any experience or training with with food allergy through your job or work?  Yes  No

*~ Thank you! You have completed this survey. ~*
